# Supplementary material
Source: publisher site journal article supplement (https://www.dovepress.com/article/389379)
Supplement: Supplementary file 1 [file get_supplementary_file.php]

# Supplementary Material

## IAT word stimuli

### Concept: Smoking

The word stimuli for the concept smoking were collated from other articles which utilised a smoking concept in their IAT (Supplementary Table 1).

Supplementary Table 1: Smoking word stimuli

| **Article author** | **Word stimuli** |
| --- | --- |
| Bardin (1) | Tobacco  Smoke  Cigarette  Marlboro  Camel |
| Huijding (2) | Smoking  Nicotine  Cigar  Smokers  Ashtray  Lighter |
| Swanson (3) | Pipe |
|  |  |

We added the additional word stimuli to capture a broader concept of smoking: Craving, Puff, Filter, Butt, Cough, Tar, Stub, Drag, Ciggy, Ash, Chain-smoke, Roll-ups, Staining

### Concept: Exercise

Word stimuli for the concept smoking were collated from articles utilising the concept exercise in their IAT (Supplementary Table 2).

Supplementary Table 2: Exercise word stimuli

| **Article author** | **Word stimuli** |
| --- | --- |
| Hyde (4) | Run  Kickbox  Walk  Sprint  Jog  Hike  Lift weights  Bench press  Aerobics  Squats  Dumbbell curls  Sit-ups |
| Chevance (5) | Dancing  Stairs  Swimming  Bike  Gardening |
| Forrest (6) | Exercise  Fitness |
|  |  |
| Berry (7) | Cross-train  Exertion  Jump |
|  |  |

We added the additional word stimuli to capture a broader concept of exercise: Healthy, Energising, Restorative

### Evaluation of concepts: Pleasant and Unpleasant

The word stimuli were the same used in the original IAT article (8). This article utilised the evaluation of concepts; pleasant and unpleasant (Supplementary Table 3).

Supplementary Table 3: Pleasant and Unpleasant word stimuli

| **Pleasant** | **Unpleasant** |
| --- | --- |
| Caress | Murder |
| Health | Accident |
| Peace | Grief |
| Friend | Stink |
| Loyal | Disaster |
| Diamond | Pollute |
| Honest | Bomb |
| Rainbow | Jail |
| Gift | Ugly |
| Miracle | Evil |
| Family | Rotten |
| Laughter | Agony |
| Vacation | Abuse |
| Freedom | Filth |
| Love | Sickness |
| Cheer | Death |
| Heaven | Poison |
| Pleasure | Assault |
| Gentle | Hatred |
| Lucky | Tragedy |
| Diploma | Divorce |
| Honor | Poverty |
| Sunrise | Suffering |
| Happy | Kill |
| Paradise | Vomit |
|  | Prison |
|  | Crash |

## References

1. Bardin B, Perrissol S, Py J, Fos Y, Souchon N. Testing of a paper-And-pencil personalized single category implicit association test (SC-IAT-P). International Review of Social Psychology. 2016; 29(1): 31-44

2. Huijding J, De Jong P, Wiers R, Verkooijen K. Implicit and explicit attitudes toward smoking in a smoking and a nonsmoking setting. Addictive Behaviors. 2005; 30(5): 949-961

3. Swanson JE, Rudman LA, Greenwalk AG. Using the implicit association test to investigate attitude-behaviour consistency for stigmatised behaviour. Cognition and Emotion. 2001; 15(2): 207-230

4. Hyde AL, Doerksen SE, Ribeiro NF, Conroy DE. The independence of implicit and explicit attitudes toward physical activity: Introspective access and attitudinal concordance. Psychology of Sport and Exercise. 2010; 11(5): 387-393

5. Chevance G, Héraud N, Guerrieri A, Rebar A, Boiché J. Measuring implicit attitudes toward physical activity and sedentary behaviors: Test-retest reliability of three scoring algorithms of the Implicit Association Test and Single Category-Implicit Association Test. Psychology of Sport and Exercise. 2017; 31: 70-78

6. Forrest LN, Smith AR, Fussner LM, Dodd DR, Clerkin EM. Using implicit attitudes of exercise importance to predict explicit exercise dependence symptoms and exercise behaviors. Psychology of sport and exercise. 2016; 22:91-97

7. Berry TR, Spence JC, Clark ME. Exercise Is In! Implicit Exercise and Sedentary-Lifestyle Bias Held by In-Groups1. Journal of Applied Social Psychology. 2011; 41(12): 2985-2998

8. Greenwald AG, McGhee DE, Schwartz JLK. Measuring individual differences in implicit cognition: The implicit association test. Journal of Personality and Social Psychology. 1998; 74(6): 1464-1480
